# Supplementary material for: Shaping Rolling Circle Amplification Products into DNA Nanoparticles by Incorporation of Modified Nucleotides and Their Application to In Vitro and In Vivo Delivery of a Photosensitizer
Source: Molecules. 2018 Jul 23;23(7):1833. doi: 10.3390/molecules23071833 (PMC6099487; doi:10.3390/molecules23071833)
Supplement: Supplementary file 1 [file molecules-23-01833-s001.pdf]

## Supporting Information

### **Shaping rolling circle amplification products into DNA nanoparticles by incorporation of modified nucleotides and their application to *in vitro* and *in vivo* delivery of a photosensitizer**

Kyoung-Ran Kim<sup>a</sup>, Pascal R  hlisberger<sup>c</sup>, Seong Jae Kang<sup>a</sup>, Kihwan Nam<sup>d</sup>, Sangyoun Lee<sup>d</sup>,  
Marcel Hollenstein<sup>c</sup>, and Dae-Ro Ahn<sup>a,b,\*</sup>

- a. Center for Theragnosis, Biomedical Research Institute, Korea Institute of Science and Technology (KIST), Hwarangno 14-gil 5, Seongbuk-gu, Seoul 02792, Korea
- b. Division of Biomedical Science and Technology, KIST School, Korea University of Science and Technology (UST), Hwarangno 14-gil 5, Seongbuk-gu, Seoul 02792, Korea
- c. Laboratory for Bioorganic Chemistry of Nucleic Acids, Department of Structural Biology and Chemistry, Institut Pasteur, CNRS UMR3523, 28, rue du Docteur Roux, 75724 Paris Cedex 15, France
- d. Center for Bionics, Biomedical Research Institute, Korea Institute of Science and Technology (KIST), Hwarangno 14-gil 5, Seongbuk-gu, Seoul 02792, Korea

\*To whom correspondence should be addressed. E-mail: [drahn@kist.re.kr](mailto:drahn@kist.re.kr)

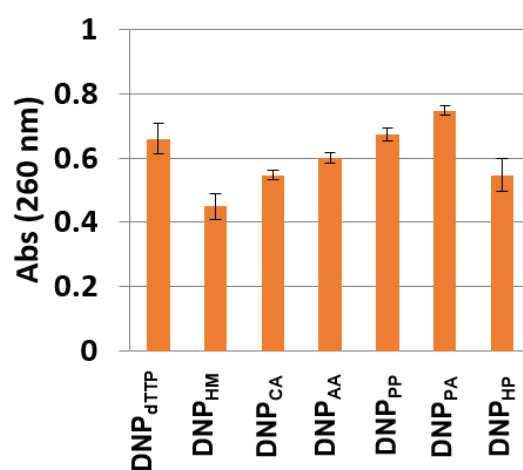

**Figure S1.** UV absorbance of DNPs at 260 nm

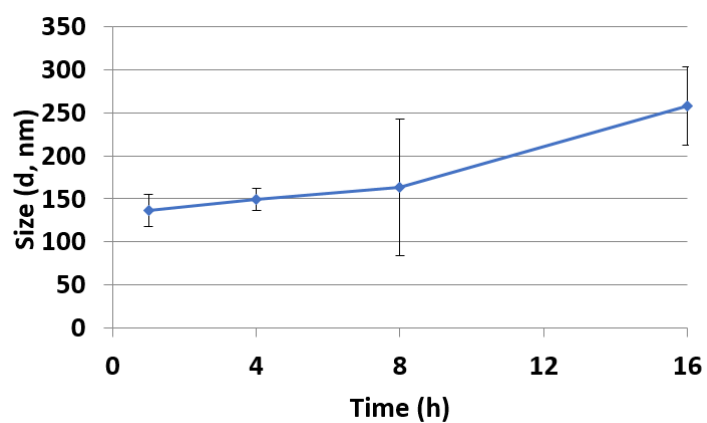

**Figure S2.** DLS analysis showing hydrodynamic sizes of DNP<sub>dTTP</sub> produced by RCA at various reaction times.

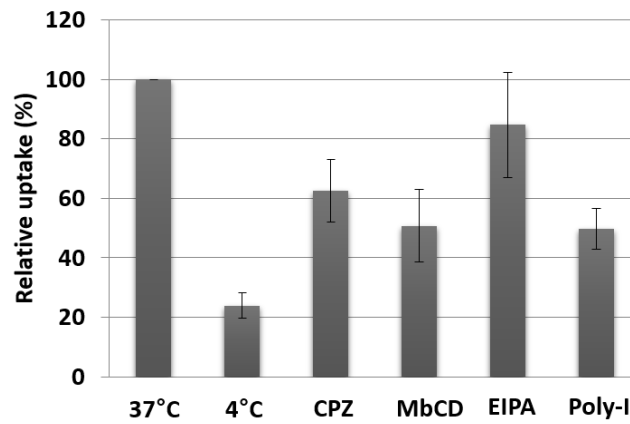

**Figure S3.** Relative cellular uptake of DNP<sub>dTTP</sub> into HeLa cells in the presence and absence of endocytosis inhibitors. Chlorpromazine (CPZ) is an inhibitor for the clathrin-dependent endocytosis. Methyl- $\beta$ -cyclodextrin (MbCD) is an inhibitor for the caveolae-dependent endocytosis. 5-(*N*-ethyl-*N*-isopropyl) amiloride (EIPA) is an inhibitor for macropinocytosis. Poly-inosinic acid (poly-I) is an inhibitor for scavenger receptor-mediated endocytosis. The uptake levels were measured by flow cytometry. The data show the results of triplicated experiments.
